# Supplementary material
Source: PubMed Central journal article supplement (PMC5282653)
Supplement: NIHMS842120-supplement-Analysis_Methods__Tables_1_and_2.pdf [file NIHMS842120-supplement-Analysis_Methods__Tables_1_and_2.pdf]

**Supplementary data to:**

**“Hepatic steatosis and cardiovascular disease outcomes: An analysis  
of the Framingham Heart Study”**

Jessica L. Mellinger, Karol M. Pencina, Joseph M. Massaro, Udo Hoffmann, Sudha  
Seshadri, Caroline S. Fox, Christopher J. O’Donnell, Elizabeth K. Speliotes

**Table of Contents**

|                                                                                                                                                                                                    |   |
|----------------------------------------------------------------------------------------------------------------------------------------------------------------------------------------------------|---|
| 1. Supplementary Analysis Methods.....                                                                                                                                                             | 2 |
| 2. Supplementary Tables.....                                                                                                                                                                       | 3 |
| Supplementary Table 1: Sex-Stratified Participant Characteristics .....                                                                                                                            | 3 |
| Supplementary Table 2. Comparison between original analysis, narrow CVD definition<br>(without CHF and PAD), and clinically-relevant covariates and association between hepatic<br>steatosis. .... | 4 |

## 1. Supplementary Analysis Methods

For our initial descriptive data, we performed univariate stratification by sex with results shown in **Supplementary Table 1**. To evaluate whether or not excluding CHF and PAD from our definition of clinical CVD changed outcomes, we performed a sensitivity analyses excluding CHF and PAD. In this analysis, we performed multivariate regression in an identical manner to our methodology in the main text of the manuscript with our primary outcome of clinical CVD now excluding CHF and PAD (renamed “narrow CVD”). The results of these sensitivity analyses did not change substantially when compared to the original analysis (see **Supplementary Table 2**).

## 2. Supplementary Tables

**Supplementary Table 1: Sex-Stratified Participant Characteristics**

| Category                          | Men             |                    | Women           |                    |
|-----------------------------------|-----------------|--------------------|-----------------|--------------------|
|                                   | CVD<br>(n=111)  | No CVD<br>(n=1382) | CVD<br>(n=66)   | No CVD<br>(n=1455) |
| Age at Exam (years)               | 61.0 (10.2)     | 48.9 (10.3)        | 64.5 (9.8)      | 51.8 (9.6)         |
| Menopause (%)**                   | 0               | 0                  | 90.9            | 49.3               |
| Hormone replacement therapy (%)** | 0               | 0                  | 36.4            | 23.6               |
| Current cigarette use (%)         | 17.1            | 13.5               | 10.6            | 12.4               |
| Mean drinks per week (SD)         | 8.3 (13.3)      | 7.5 (9.1)          | 2.7 (6.0)       | 3.4 (4.8)          |
| <b>Glucose-related</b>            |                 |                    |                 |                    |
| Fasting glucose (mg/dL)           | 116.3 (48.9)    | 101.0 (20.3)       | 104.9 (27.9)    | 95.0 (16.7)        |
| Diabetes mellitus (%)             | 20.7            | 5.8                | 21.2            | 4.5                |
| <b>Blood pressure-related</b>     |                 |                    |                 |                    |
| Hypertensive drug use (%)         | 55.9            | 15.8               | 51.5            | 17.0               |
| Systolic BP (mmHg)                | 126.7 (18.2)    | 122.9 (14.4)       | 130.6 (18.3)    | 119.7 (17.7)       |
| Diastolic BP (mmHg)               | 73.2 (9.8)      | 78.1 (8.9)         | 73.5 (10.3)     | 73.4 (9.1)         |
| <b>Lipid-related</b>              |                 |                    |                 |                    |
| Triglycerides (mg/dL)             | 175.7 (149.8)   | 139.0 (106)        | 162.0 (103.7)   | 110.7 (65.7)       |
| HDL-cholesterol (mg/dL)           | 42.0 (11.9)     | 46.5 (12.6)        | 56.5 (17.7)     | 61.8 (16.7)        |
| Total cholesterol (mg/dL)         | 179.5 (39.4)    | 195.75 (33.8)      | 201.3 (38.5)    | 197.9 (36.2)       |
| <b>Fat-related</b>                |                 |                    |                 |                    |
| BMI (kg/m <sup>2</sup> )          | 29.3 (5.2)      | 28.0 (4.3)         | 27.4 (5.7)      | 26.7 (5.4)         |
| Waist Circ (mm)                   | 1042.2 (116.5)  | 996.7 (108.6)      | 991.0 (128.1)   | 954.9 (954.9)      |
| SAT (cm <sup>3</sup> )            | 2670.7 (1073.6) | 2512.6 (1135.3)    | 2938.6 (1279.6) | 3053.1 (1434.8)    |
| VAT (cm <sup>3</sup> )            | 2873.6 (1314.5) | 2130.2 (2130.2)    | 1784.5 (746)    | 1311.0 (809.6)     |
| Metabolic syndrome (%)            | 63.1            | 33.2               | 56.1            | 25.1               |
| <b>Outcomes<sup>^</sup></b>       |                 |                    |                 |                    |
| AAC (%) <sup>&amp;</sup>          | 55.9            | 22.9               | 57.6            | 24.7               |
| CAC (%) <sup>&amp;</sup>          | 54.0            | 18.4               | 36.4            | 17.0               |
| <b>Predictor</b>                  |                 |                    |                 |                    |
| Liver phantom ratio <sup>#</sup>  | 0.34 (0.06)     | 0.35 (0.06)        | 0.36 (0.05)     | 0.36 (0.04)        |

Abbreviations: BP=blood pressure, HDL=high density lipoprotein, BMI=body mass index, SAT=subcutaneous adipose tissue, VAT=visceral adipose tissue, CVD=cardiovascular disease, NAFLD=non-alcoholic fatty liver disease.

\*Data are presented as mean (standard deviation) or % (number of individuals).

\*\*Data shown for women only: n=1521.

<sup>^</sup> P < 0.001 for AAC and CAC in men versus women

<sup>&</sup> Defined as age- and sex-specific values in the 90<sup>th</sup> percentile for healthy participants

<sup>#</sup> NAFLD defined as liver-phantom ratio of 0.33 or less

**Supplementary Table 2. Comparison between original analysis, narrow CVD definition (without CHF and PAD), and clinically-relevant covariates and association between hepatic steatosis.**

| Original Covariates                         | Original CVD Analysis |        | Narrow CVD* with Original Covariates |        |
|---------------------------------------------|-----------------------|--------|--------------------------------------|--------|
|                                             | OR                    | Pvalue | OR                                   | Pvalue |
| Age+sex+age <sup>2</sup>                    | 1.14<br>(0.99-1.32)   | 0.072  | 1.14<br>(0.98-1.33)                  | 0.083  |
| Covariates                                  | 1.14<br>(0.99-1.32)   | 0.074  | 1.14<br>(0.98-1.33)                  | 0.082  |
| Covariates +BMI                             | 1.11<br>(0.95-1.29)   | 0.178  | 1.14<br>(0.97-1.33)                  | 0.119  |
| Covariates + diabetes                       | 1.10<br>(0.95-1.27)   | 0.218  | 1.11<br>(0.95-1.30)                  | 0.185  |
| Covariates + HDL                            | 1.10<br>(0.95-1.27)   | 0.222  | 1.10<br>(0.94-1.29)                  | 0.216  |
| Covariates + HTN                            | 1.07<br>(0.92-1.24)   | 0.388  | 1.07<br>(0.92-1.25)                  | 0.392  |
| Covariates + metabolic syndrome             | 1.05<br>(0.90-1.22)   | 0.532  | 1.05<br>(0.90-1.23)                  | 0.540  |
| Covariates + SAT                            | 1.15<br>(0.99-1.33)   | 0.074  | 1.16<br>(0.99-1.35)                  | 0.070  |
| Covariates + VAT                            | 1.04<br>(0.89-1.22)   | 0.624  | 1.05<br>(0.89-1.25)                  | 0.554  |
| Covariates + triglycerides                  | 1.08<br>(0.95-1.25)   | 0.347  | 1.08<br>(0.92-1.26)                  | 0.348  |
| Covariates + waist circumference            | 1.10<br>(0.95-1.29)   | 0.211  | 1.12<br>(0.96-1.32)                  | 0.159  |
| Clinical Covariate Profile <sup>&amp;</sup> | 1.06<br>(0.90-1.25)   | 0.494  | 1.09<br>(0.92-1.30)                  | 0.321  |

\*"Narrow CVD" was defined as nonfatal MI, stroke, and TIA and excluded CHF and PAD from the original definition.

<sup>&</sup>Composite of the following: age, age<sup>2</sup>, sex, alcohol use, smoking, menopause, HRT use, diabetes, BMI, HDL, total cholesterol, HTN, and presence of lipid-lowering medications.
